# Supplementary material
Source: PubMed Central journal article supplement (PMC2323352)
Supplement: pcbi.0040004.sg001.pdf [file pcbi.0040004.sg001.pdf]

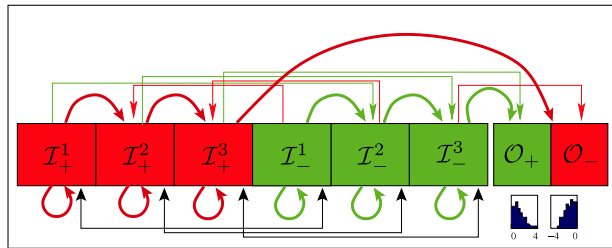

Supplementary Figure 1: Similar state space to Figure 1, but with a more explicitly deep structure. State in  $\mathcal{I}_+^1$  mainly lead to  $\mathcal{I}_+^2$ , or back to themselves. The last states in each of the two chains (here  $\mathcal{I}_+^3$  and  $\mathcal{I}_-^3$ ) always preferentially lead to the outcome state  $\mathcal{O}_+$  and  $\mathcal{O}_-$ .

Supplementary Figure 1 for Dayan P, Huys QJM (2008) Serotonin, inhibition and negative mood. PLoS Comput Biol 4(1):e4  
doi:10.1371/journal.pcbi.0040004.sg001
