# Supplementary material
Source: PubMed Central journal article supplement (PMC2323352)
Supplement: pcbi.0040004.sg002.pdf [file pcbi.0040004.sg002.pdf]

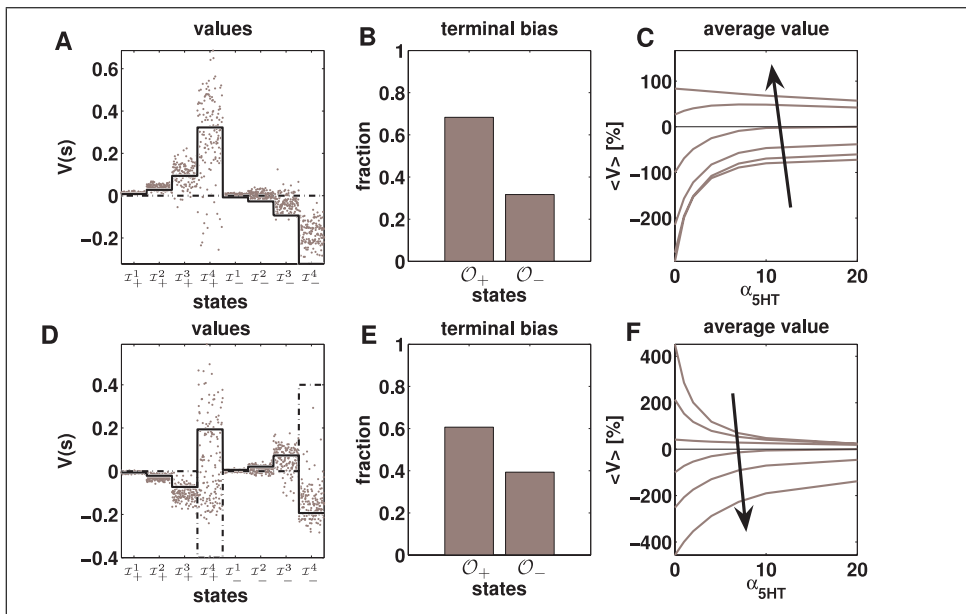

Supplementary Figure 2: Inhibition in a deep environment. The outcomes  $\mathcal{O}$  are approached by sequentially walking through  $K = 4$  levels. Only  $\mathcal{I}^4$  states lead to outcomes. (A,D): True values without inhibition are shown by black line. It is constant for each level and valence as, or illustration, all outcomes were assigned the same positive value (+1 or -1). The reward of the states  $\mathcal{I}$  is zero and shown by the dash-dotted line. The grey point display the estimated values of the states under inhibition  $\alpha_{5HT} = 20$ . There is a positive bias in all states, but it is more pronounced in the states with true negative values. In (D), the dash-dotted line indicates that states  $\mathcal{I}_+^4$  now carry reward  $-0.4$ , while states  $\mathcal{I}_-^4$  carry reward  $+0.4$ . States  $\mathcal{I}_+^k$  for  $k = \{1, 2, 3\}$  now have true negative values and  $\mathcal{I}_-^k$  for  $k = \{1, 2, 3\}$  have true positive values. (B,E): Probabilities of ending thought sequence in  $\mathcal{O}_+$  or  $\mathcal{O}_-$ . (C,F): Effect of preferentially choosing actions according to their valence on the average value of states. The arrow indicates increasing  $\theta$ . In (C), larger  $\theta$  are advantageous, in (F), smaller  $\theta$  are better.

Supplementary Figure 2 for Dayan P, Huys QJM (2008) Serotonin, inhibition and negative mood. PLoS Comput Biol 4(1):e4  
doi:10.1371/journal.pcbi.0040004.sg002
